# Supplementary material for: Cu/Mg/Al/Zr non-noble metal catalysts for o-phenylphenol synthesis
Source: Royal Society of Chemistry journal article supplement (doi:10.1039/c5ra25340c), 2016-01-01
Supplement: c5ra25340c1.pdf [file c5ra25340c1.pdf]

1 Supplementary materials for:

2 **Cu/Mg/Al/Zr Non-Noble Metal Catalysts for O-Phenylphenol Synthesis**

3 **Yongping Zeng<sup>\*,†</sup>, Tianchi Zhang, Yueyang Xu<sup>‡</sup>, Peili Hu<sup>†</sup>, Ting Ye<sup>‡</sup>, Zehua Jia<sup>†</sup>, Shengui**

4 **Ju<sup>‡</sup>**

5 <sup>†</sup>College of Chemistry and Chemical Engineering, Yangzhou University, Yangzhou, 225002, China

6 <sup>‡</sup>Guodian Science and Technology Research Institute, Nanjing, 210031, China

7 <sup>‡</sup>the State Key Laboratory of Materials-Oriented Chemical Engineering, Nanjing Tech University, Nanjing,  
8 210009, China

9 (\* is the corresponding author: [ypzeng@yzu.edu.cn](mailto:ypzeng@yzu.edu.cn))

10

11 **FT-IR for samples before calcination:**

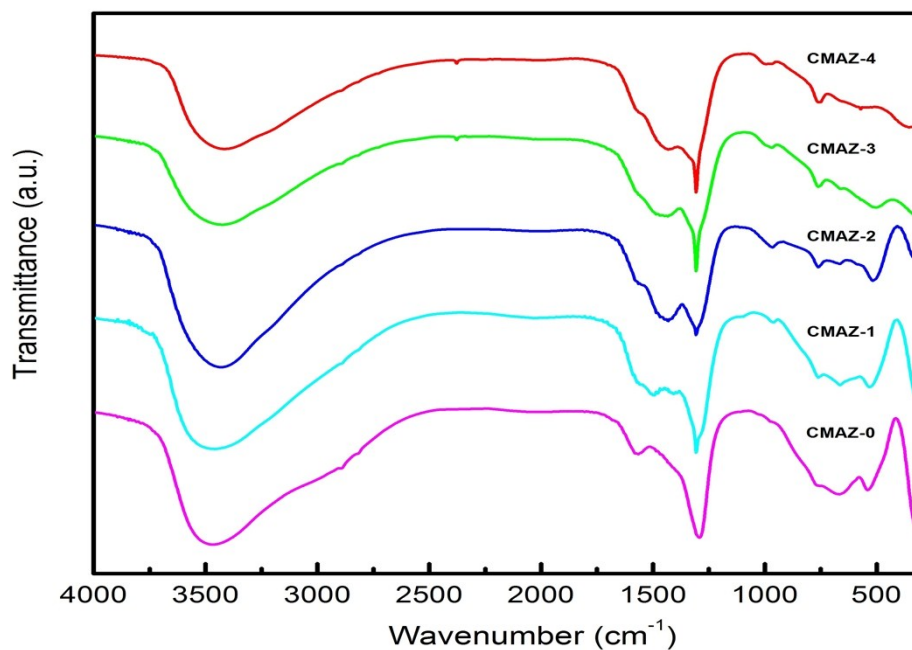

12

13 **Fig.S1** FT-IR profile of Cu/Mg/Al/Zr catalysts before calcination.

14

15

# 1 TG-DTG for precursors:

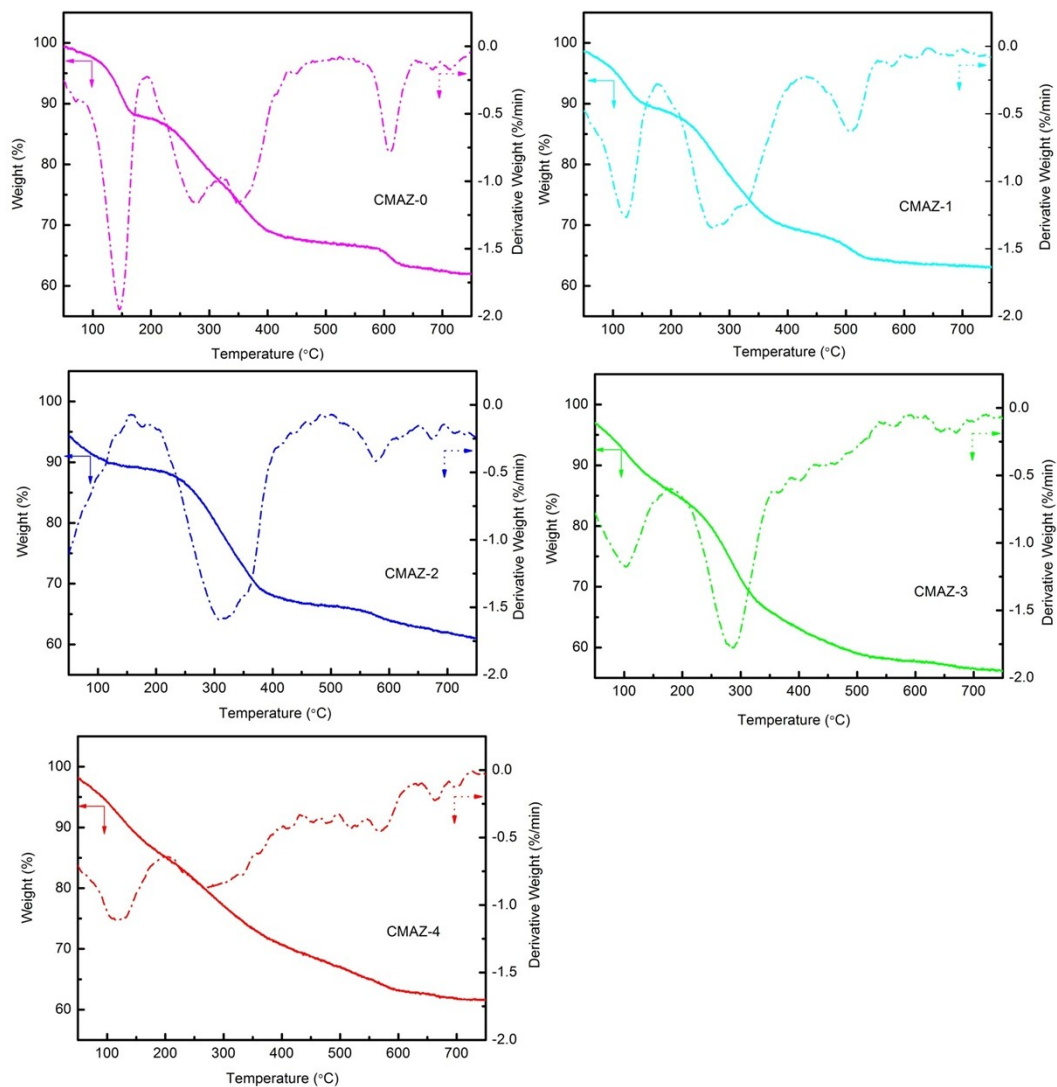

2

3

**Fig. S2** TG-DTG of the precursors in N<sub>2</sub>.

4

5

6

7

8

1 HRTEM and elemental mapping images:

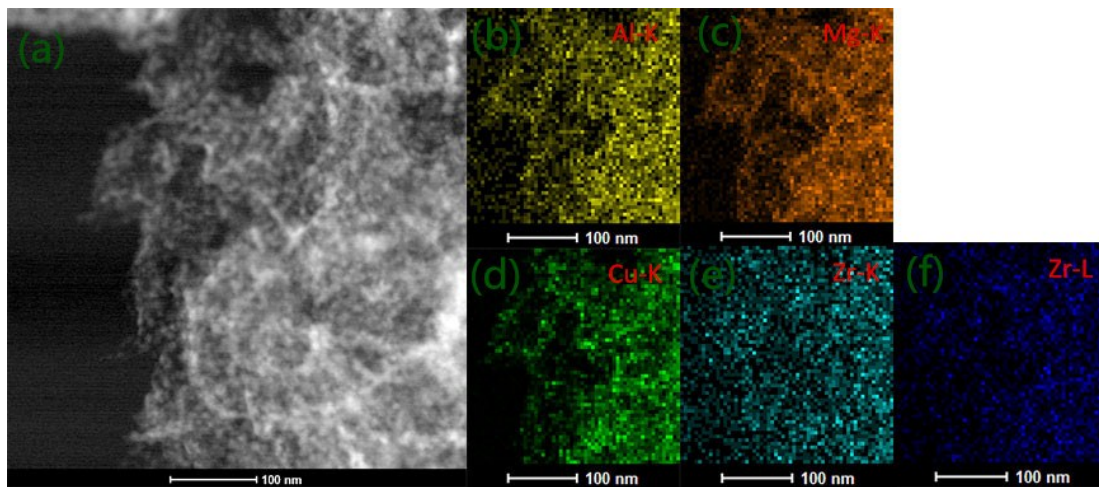

2

3

4 **Fig. S3** HRTEM and elemental mapping images of catalysts after reduction (a)

5 Cu/Mg/Al/Zr catalysts (b) Al-K map (c) Mg-K map (d) Cu-K map (e) Zr-K map (f) Zr-L

6

map

7

8

9

10

11

12

13

14

15

16

17

1 **N<sub>2</sub> adsorption-desorption isotherms:**

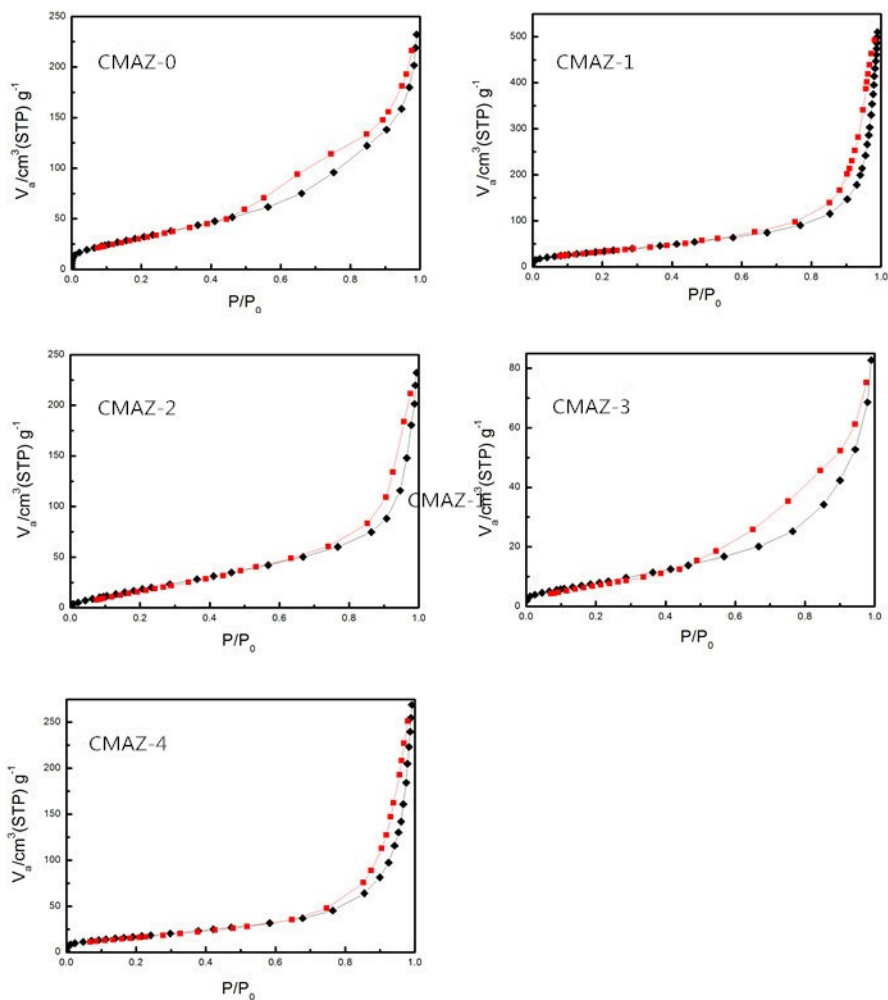

2

3 **Fig S4** N<sub>2</sub> adsorption-desorption isotherms of the CHT0.4, CHT0.8, CHT 1.5, CHT 1.8,

4

CHT 2.0 and CHT 2.5 samples.

5

6

7

8

9

10

1 FT-IR for samples after calcined:

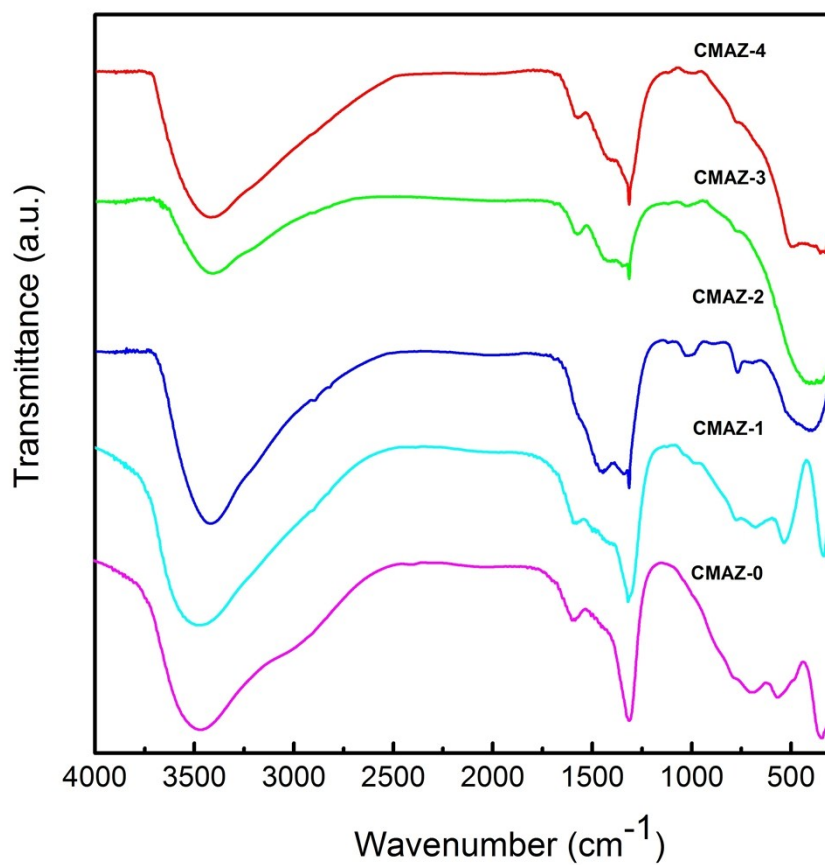

2

3

**Fig. S5** FT-IR profile of Cu/Mg/Al/Zr catalysts after calcined.

4

5

6

7

8

9

10

11

1 **Table 1S** The conversions for different Zr content catalysts at 330 °C.

|        | 1h    | 2h    | 3h    | 4h    | 5h    | 6h    | 7h    |
|--------|-------|-------|-------|-------|-------|-------|-------|
| CMAZ-0 | 98.55 | 99.71 | 99.54 | 99.25 | 98.75 | 98.70 | 97.61 |
| CMAZ-1 | 99.49 | 99.70 | 99.36 | 99.31 | 99.01 | 98.63 | 98.21 |
| CMAZ-2 | 97.33 | 96.04 | 95.23 | 94.30 | 93.33 | 91.25 | 88.88 |
| CMAZ-3 | 95.65 | 96.32 | 95.97 | 95.78 | 94.17 | 90.23 | 88.79 |
| CMAZ-4 | 84.89 | 67.45 | 48.13 | 37.74 | 27.35 | 27.53 | 26.90 |

2
